# Supplementary material for: Suppression of polysulfide shuttling with a separator modified using spontaneously polarized bismuth ferrite for high performance lithium–sulfur batteries
Source: Royal Society of Chemistry journal article supplement (doi:10.1039/d0ta05181k), 2020-01-01
Supplement: d0ta05181k1.pdf [file d0ta05181k1.pdf]

## Electronic supplementary information

### **Suppression of polysulfides shuttling with separator modified by spontaneously polarized bismuth ferrite for high performance lithium-sulfur battery**

Hao Cheng <sup>a</sup>, Huayun Liu <sup>a</sup>, Han Jin <sup>a</sup>, Ning Cai <sup>a</sup>, Cheng Gao <sup>a</sup>, Sihan Zhao<sup>\* b</sup>, Miao Wang<sup>\* a</sup>  
Zhejiang Province key Laboratory of Quantum Technology and Device, Department of Physics, Zhejiang University, Hangzhou 310027, P. R. China.

Department of Physics, University of California at Berkeley, Berkeley, California 94720, USA.

---

\* Correspondence should be addressed to: [sihanzhao88@berkeley.edu](mailto:sihanzhao88@berkeley.edu) and [miaowang@zju.edu.cn](mailto:miaowang@zju.edu.cn)

Tab. S1 Lattice parameters of BiFeO<sub>3</sub> (BFO#2) obtained by Rietveld refinement.

| <b>BiFeO<sub>3</sub></b><br><b>(BFO#2)</b> | a=5.58243        | b=5.58243       | c=13.87535        | R3c    |
|--------------------------------------------|------------------|-----------------|-------------------|--------|
|                                            | $\alpha=90.0000$ | $\beta=90.0000$ | $\gamma=120.0000$ |        |
|                                            | X                | Y               | Z                 | Occ.   |
| <b>Bi</b>                                  | 0.0000           | 0.0000          | 0.0000            | 1.0000 |
| <b>Fe</b>                                  | 0.0000           | 0.0000          | 0.2215            | 1.0000 |
| <b>O</b>                                   | 0.4392           | 0.0045          | 0.9517            | 1.0000 |

Tab. S2 The impedance parameters for the cell with PP, GO/AB@PP and BFO/GO/AB@PP separators.

| Separators   | State                   | $R_0$ ( $\Omega$ ) | $R_{ct1}$ ( $\Omega$ ) | $R_{ct2}$ ( $\Omega$ ) |
|--------------|-------------------------|--------------------|------------------------|------------------------|
| PP           | Before 1 <sup>st</sup>  | 7.53               | 102.43                 | 35.12                  |
|              | After 600 <sup>th</sup> | 5.82               | 64.25                  | 36.46                  |
| GO/AB@PP     | Before 1 <sup>st</sup>  | 7.31               | 75.53                  | 13.43                  |
|              | After 600 <sup>th</sup> | 5.69               | 58.43                  | 12.54                  |
| BFO/GO/AB@PP | Before 1 <sup>st</sup>  | 6.76               | 62.87                  | 12.85                  |
|              | After 600 <sup>th</sup> | 5.40               | 45.38                  | 9.67                   |

Tab. S3 Comparison of layer thickness/mass, sulfur content/mass loading and areal capacity between our BFO/GO/AB@PP separator and functional separator designs in recent works.

| Layer materials                                           | Layer thickness ( $\mu\text{m}$ ) | Layer mass ( $\text{mg cm}^{-2}$ ) | Sulfur content in cathode (%) | Sulfur loading ( $\text{mg cm}^{-2}$ ) | Current density (C) | Areal capacity ( $\text{mAh cm}^{-2}$ ) | Ref.             |
|-----------------------------------------------------------|-----------------------------------|------------------------------------|-------------------------------|----------------------------------------|---------------------|-----------------------------------------|------------------|
| BFO/GO/AB                                                 | 25                                | 0.48                               | 80%                           | 5.6                                    | 0.1                 | 5.1                                     | <b>This work</b> |
| Sb <sub>2</sub> Se <sub>3-x</sub> /rGO                    | 32                                | 0.5                                | 70%                           | 8.1                                    | 0.1                 | 7.46                                    | 1                |
| Fe <sub>3</sub> C/CNF                                     | 105                               | 2.25                               | 70%                           | 2.6                                    | 0.12                | 0.65                                    | 2                |
| TiO <sub>2</sub> /CNF                                     | 35                                | 0.55                               | 60%                           | 2.0                                    | 0.1                 | 2.40                                    | 3                |
| oPANVP/SnCl <sub>2</sub>                                  | 185                               | 0.6                                | 63%                           | 3.0                                    | 0.2                 | 3.09                                    | 4                |
| Li <sub>4</sub> Ti <sub>5</sub> O <sub>12</sub> @Graphene | 35                                | 0.35                               | 60%                           | 1.1                                    | 0.1                 | 1.55                                    | 5                |
| MOF@GO                                                    | ~ 20                              | ~                                  | 70%                           | 0.8                                    | 0.2                 | 0.86                                    | 6                |
| Mesoporous carbon                                         | 27                                | 0.5                                | 70%                           | 1.55                                   | 0.2                 | 2.14                                    | 7                |
| Light-weight Carbon (Super P)                             | 20                                | 0.2                                | 60%                           | 1.3                                    | 0.2                 | 1.80                                    | 8                |

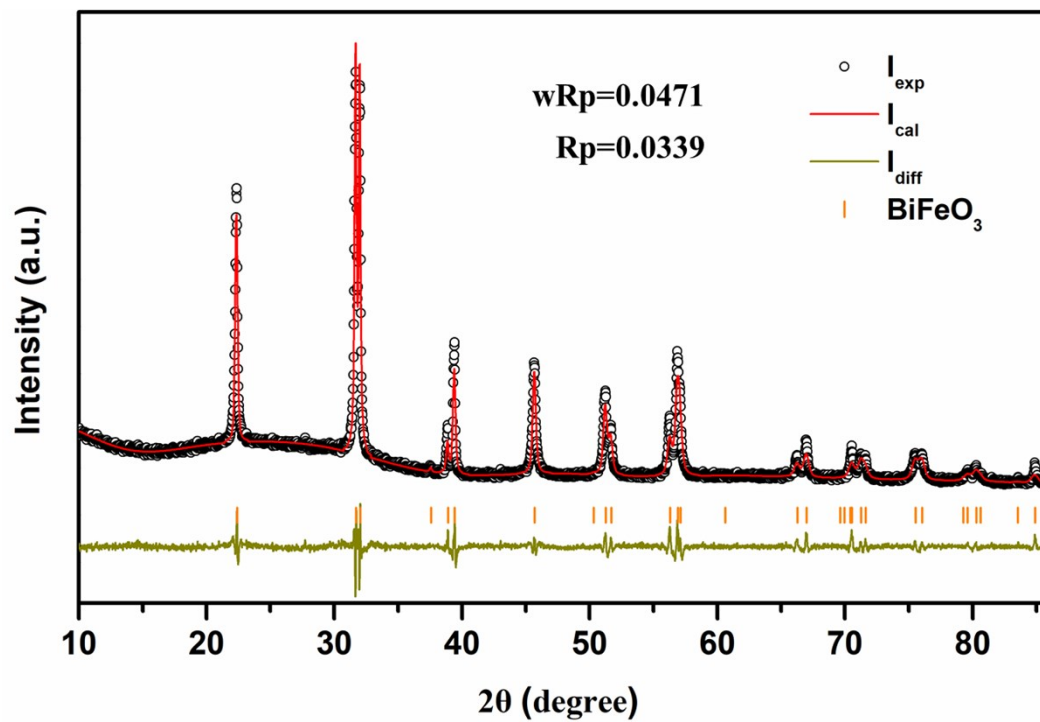

Fig. S1 Experimental, calculated, difference XRD patterns of BiFeO<sub>3</sub> (BFO#2) particles.

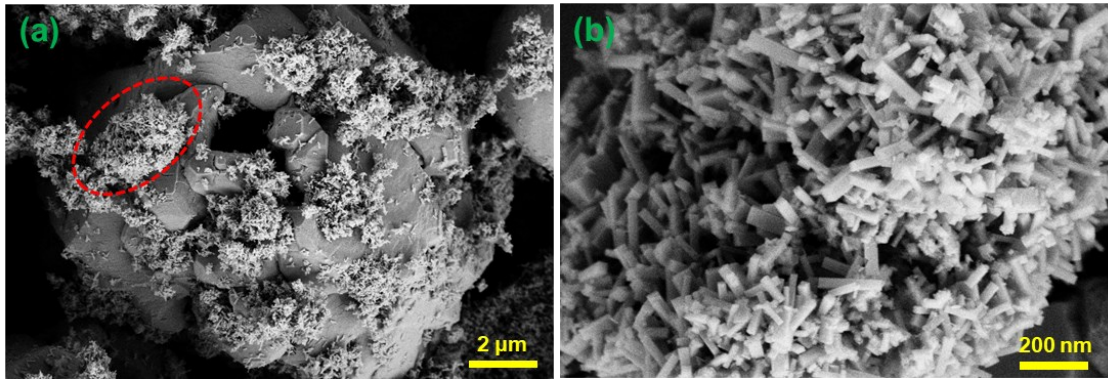

Fig. S2 (a) SEM image of BFO#0, (b) high-resolution SEM image of red circle in (a).

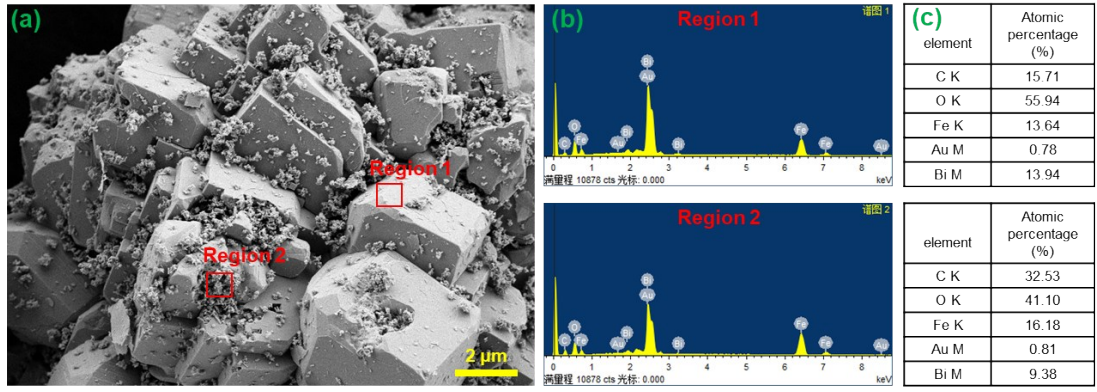

Fig. S3 (a) SEM image of BFO#1, (b) EDS spectrum and (c) atomic percentage of region 1 and region 2 in (a), respectively.

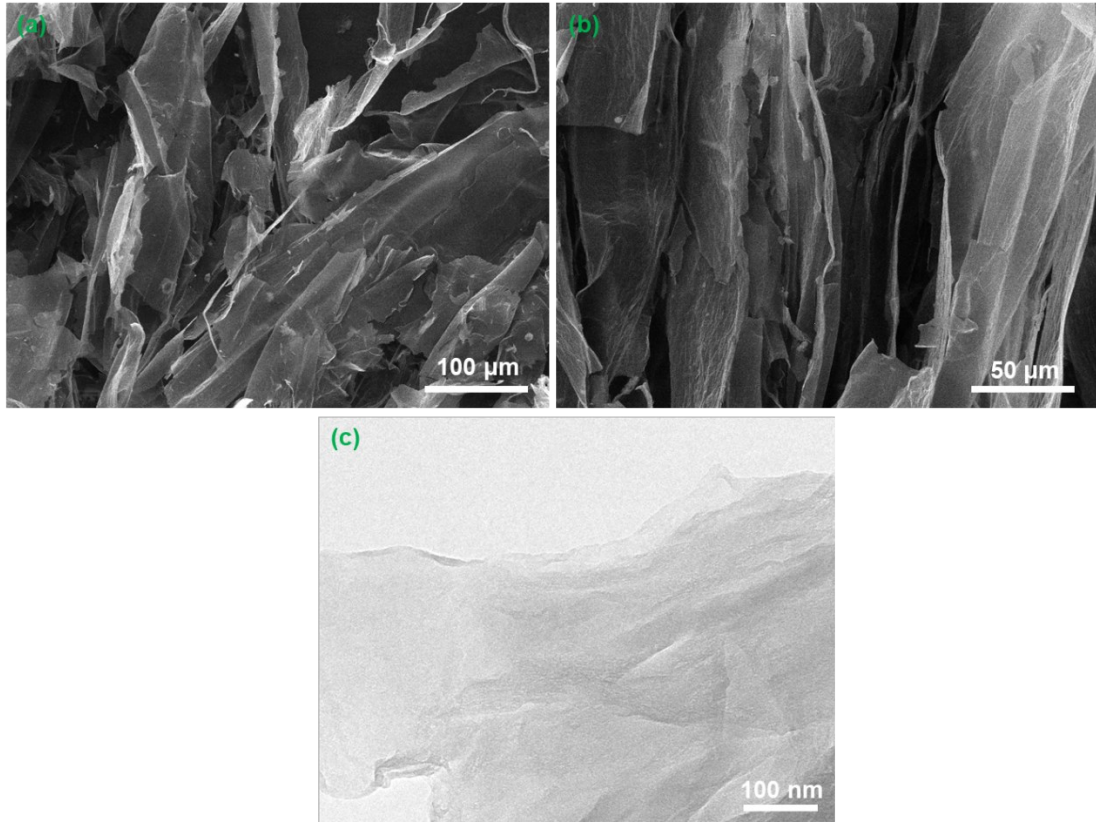

Fig. S4 (a, b) SEM and (c) TEM images of GO.



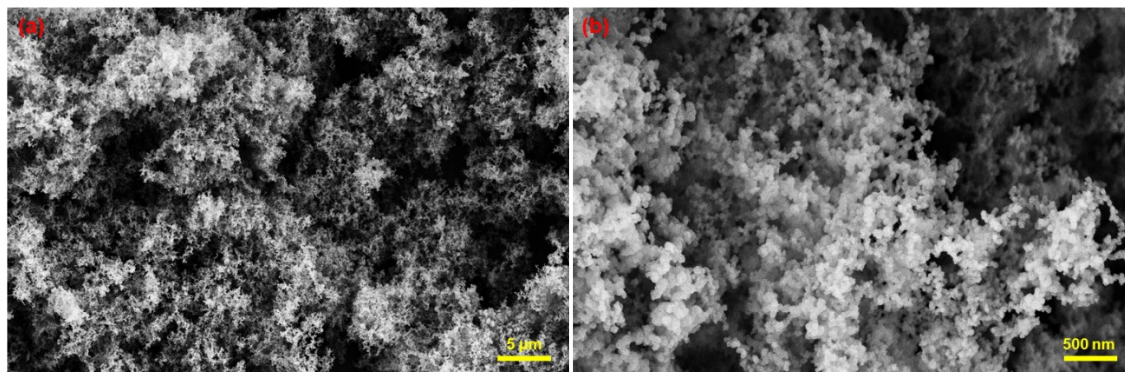

Fig. S5 (a, b) SEM images of AB.

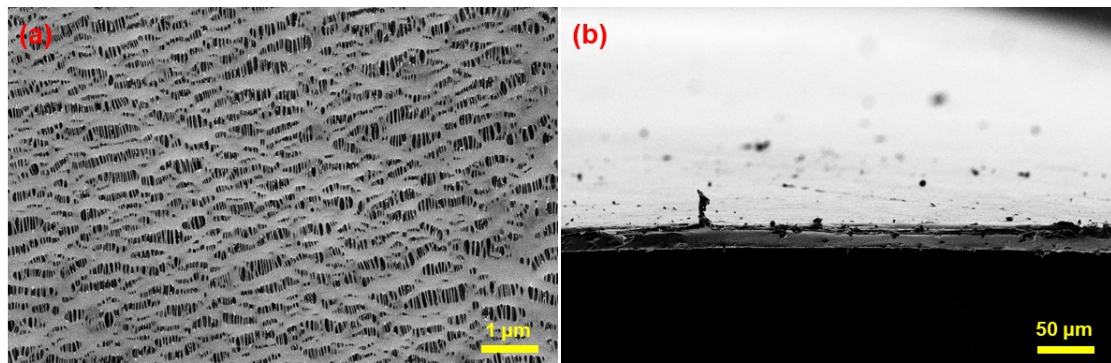

Fig. S6 (a) Top-view and (b) cross-section SEM images of pristine PP separator.

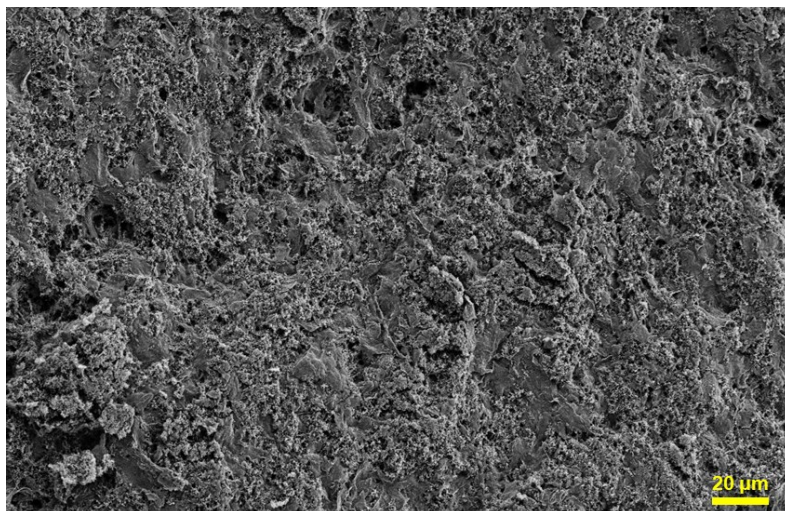

Fig. S7 Top-view SEM image of BFO/GO/AB/PP separator.

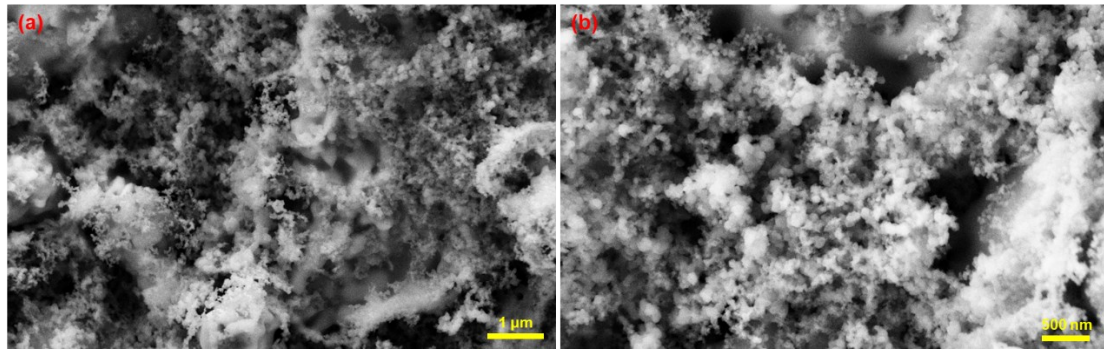

Fig. S8 (a, b) SEM images of C/S composite.

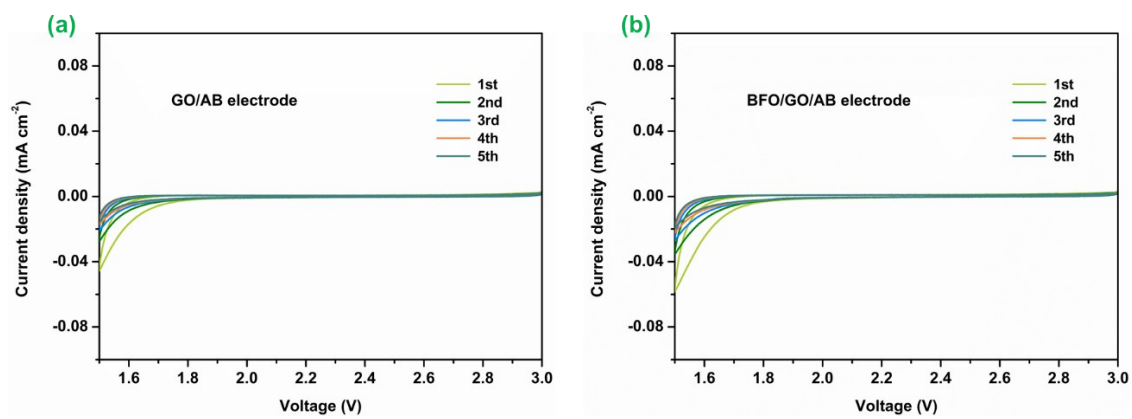

Fig. S9 CV curves of (a) GO/AB electrode and (b) BFO/GO/AB electrode at a scanning rate of  $0.1 \text{ mV s}^{-1}$ .

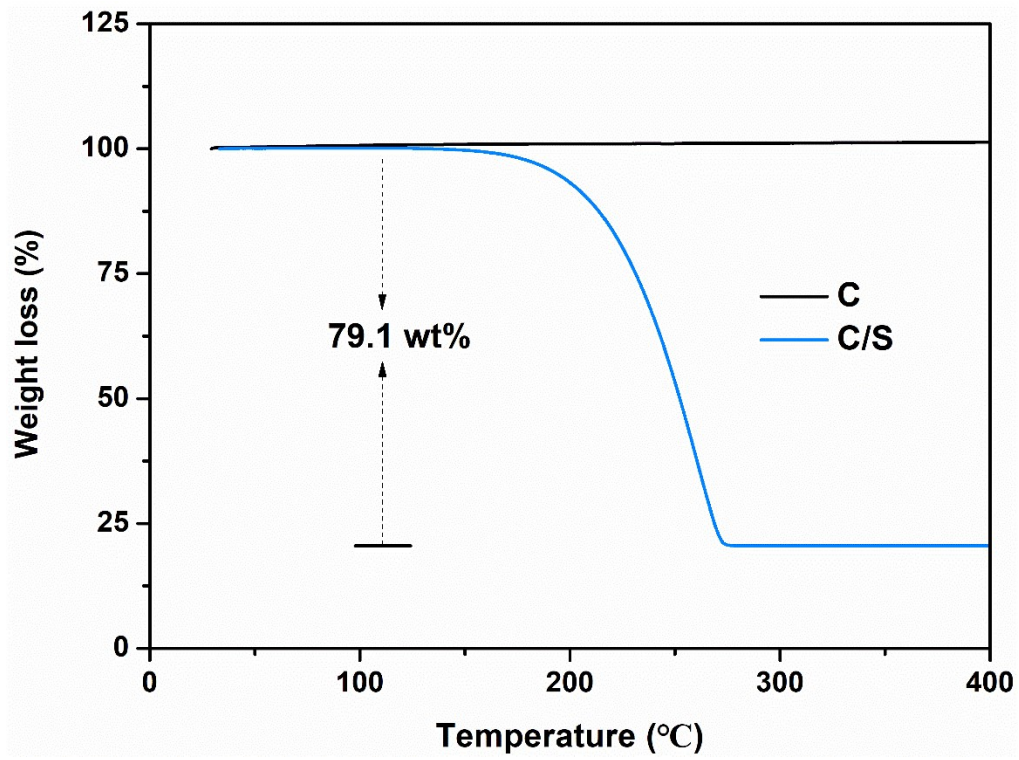

Fig. S10 TGA curves of C and C/S composite.

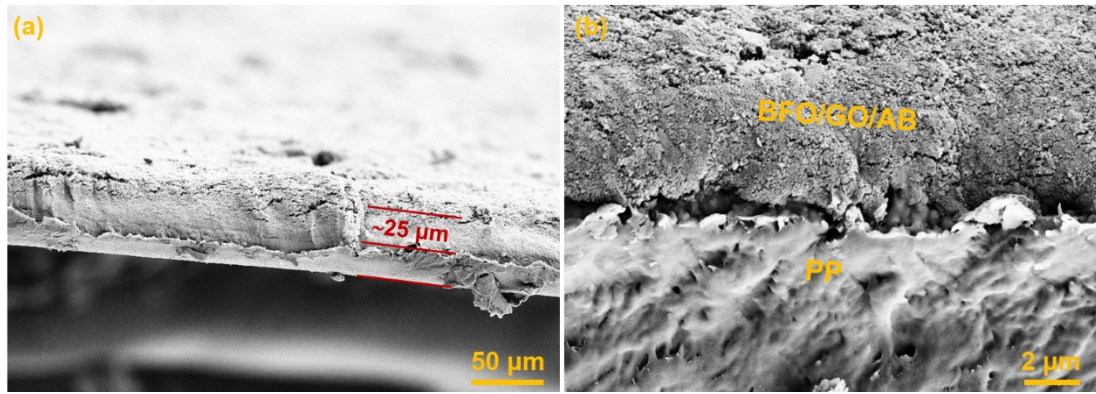

Fig. S11 (a,b) SEM images of BFO/GO/AB@PP separator after 600 cycles at 0.2 C.

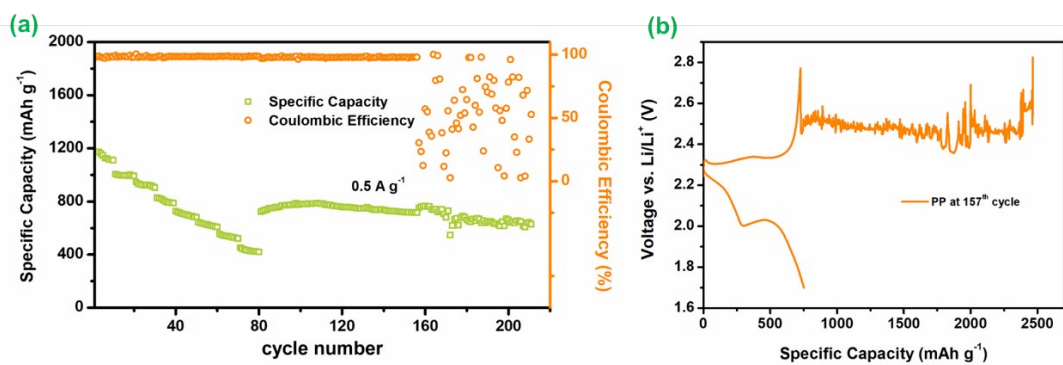

Fig. S12 (a) Rate performance and (b) charge-discharge curves at 157<sup>th</sup> cycle for the cell with pristine PP separator.



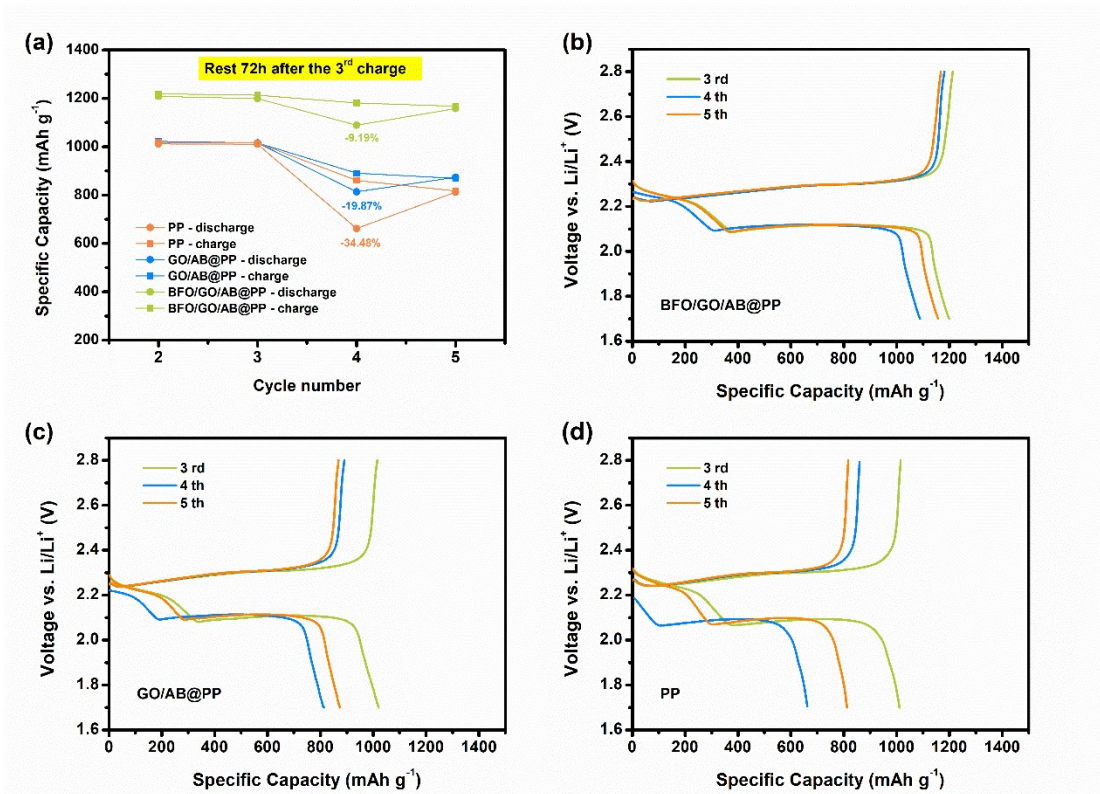

Fig. S13 (a) Cycling performance at 0.2 C with a sulfur loading of 2.0 mg cm<sup>-2</sup>, the cells were rested for 72 h before the 4<sup>th</sup> discharge. (b-d) The 3<sup>rd</sup>, 4<sup>th</sup> and 5<sup>th</sup> charge-discharge curves of the cells with BFO/GO/AB@PP, GO/AB@PP and PP separators, respectively.

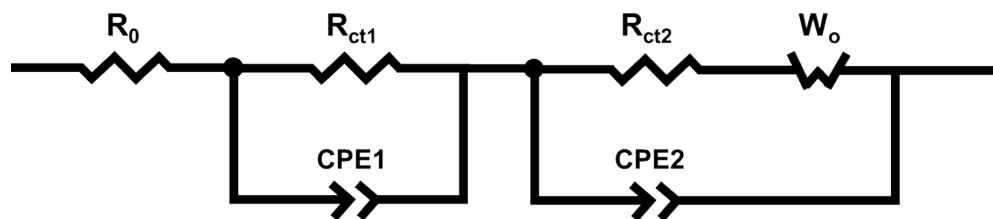

Fig. S14 The fitted equivalent circuit model.

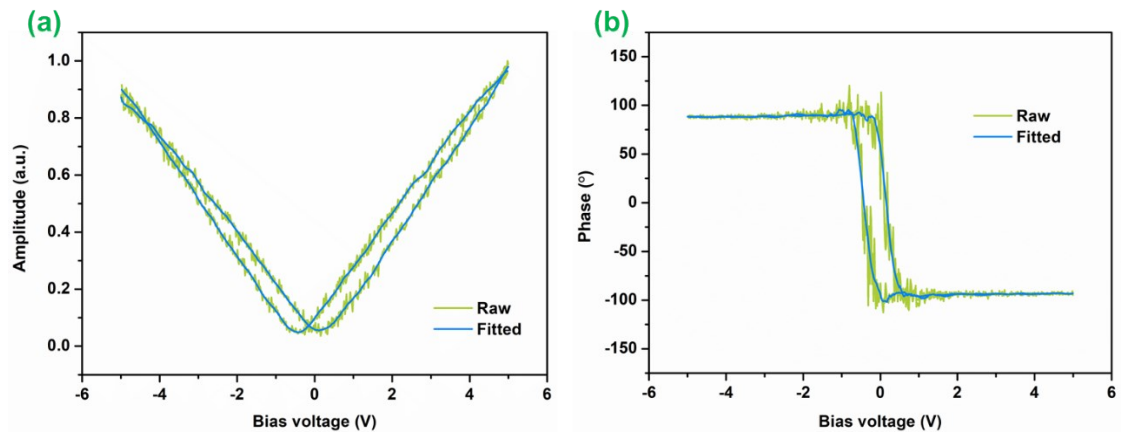

Fig. S15 PFM hysteresis loops of (a) amplitude and (b) phase for BFO/GO/AB@PP separator after cycled.

## Reference

1. Y. Tian, G. Li, Y. Zhang, D. Luo, X. Wang, Y. Zhao, H. Liu, P. Ji, X. Du and J. Li, *Adv. Mater.*, 2020, 32, 1904876.
2. J.-Q. Huang, B. Zhang, Z.-L. Xu, S. Abouali, M. A. Garakani, J. Huang and J.-K. Kim, *J. Power Sources*, 2015, 285, 43-50.
3. G. Liang, J. Wu, X. Qin, M. Liu, Q. Li, Y.-B. He, J.-K. Kim, B. Li and F. Kang, *ACS Appl. Mater. Interfaces*, 2016, 8, 23105-23113.
4. E. C. Cengiz, O. Ozturk, S. H. Soytaş and R. Demir-Cakan, *J. Power Sources*, 2019, 412, 472-479.
5. Y. Zhao, M. Liu, W. Lv, Y.-B. He, C. Wang, Q. Yun, B. Li, F. Kang and Q.-H. Yang, *Nano Energy*, 2016, 30, 1-8.
6. S. Bai, X. Liu, K. Zhu, S. Wu and H. Zhou, *Nat. Energy*, 2016, 1, 1-6.
7. J. Balach, T. Jaumann, M. Klose, S. Oswald, J. Eckert and L. Giebeler, *Adv. Funct. Mater.*, 2015, 25, 5285-5291.
8. S. H. Chung and A. Manthiram, *Adv. Funct. Mater.*, 2014, 24, 5299-5306.
